# Supplementary material for: The immune regulation of BCL3 in glioblastoma with mutated IDH1
Source: publisher site journal article supplement (doi:10.18632/aging.204048), 2022-04-29
Supplement: Supplementary file [file aging-v14i9-204048-supplementary-material-SD1.pdf]

# SUPPLEMENTARY FIGURES

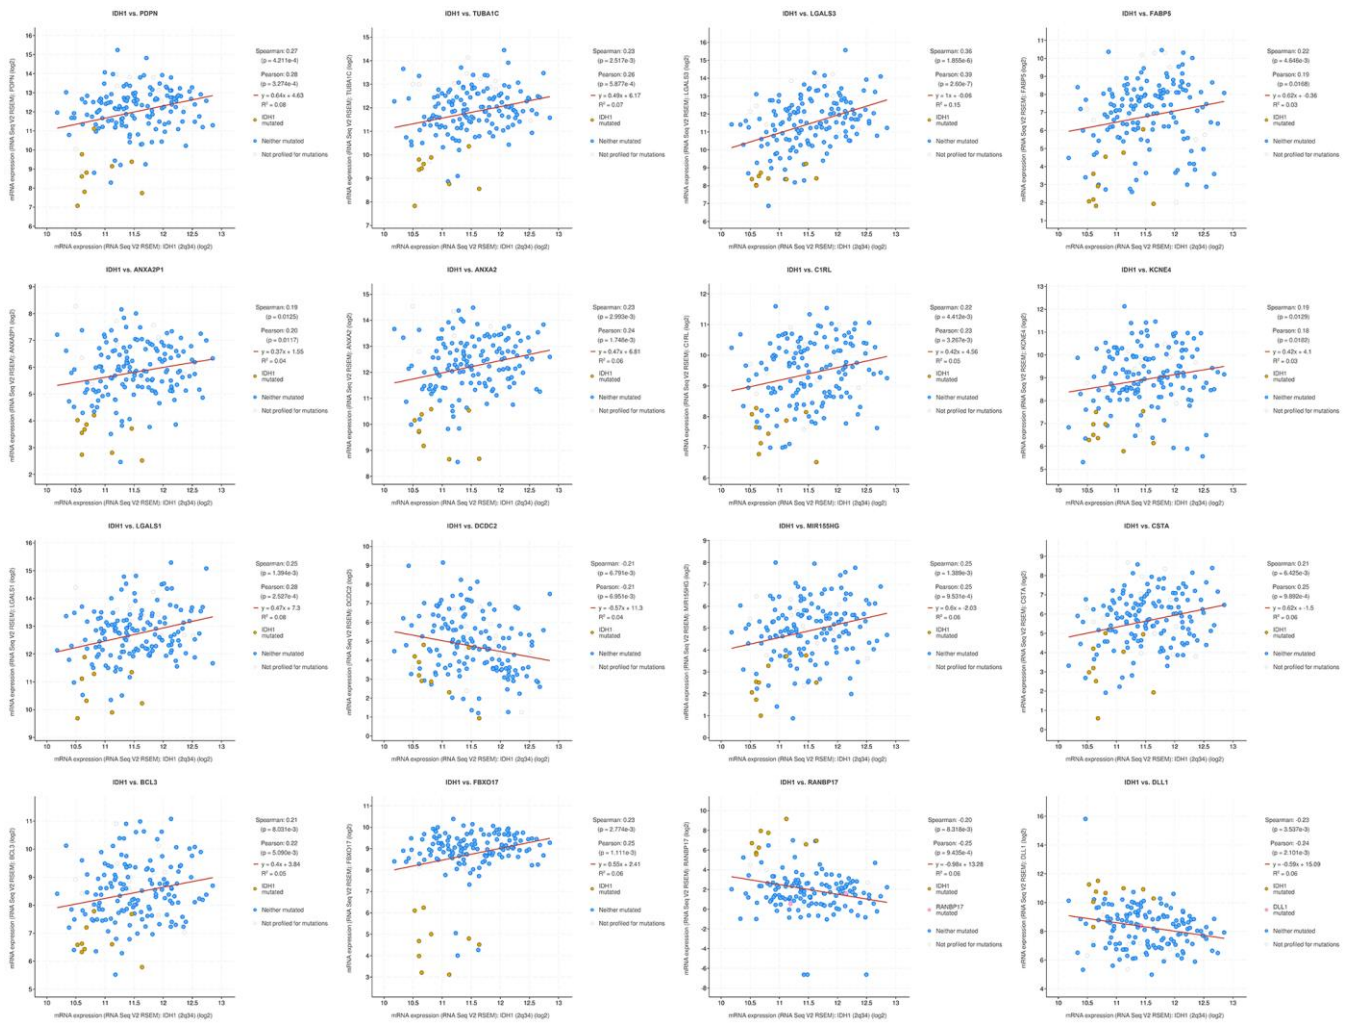

**Supplementary Figure 1. The expression level correlation between IDH1 and DEGs.** The red line represents the linear regression equation, and the correlation was calculated by Spearman and Pearson algorithms simultaneously (with p-value). The yellow dots represent samples with IDH1 mutations, the blue ones represent samples neither mutated and the white ones represent no profiled for mutations.

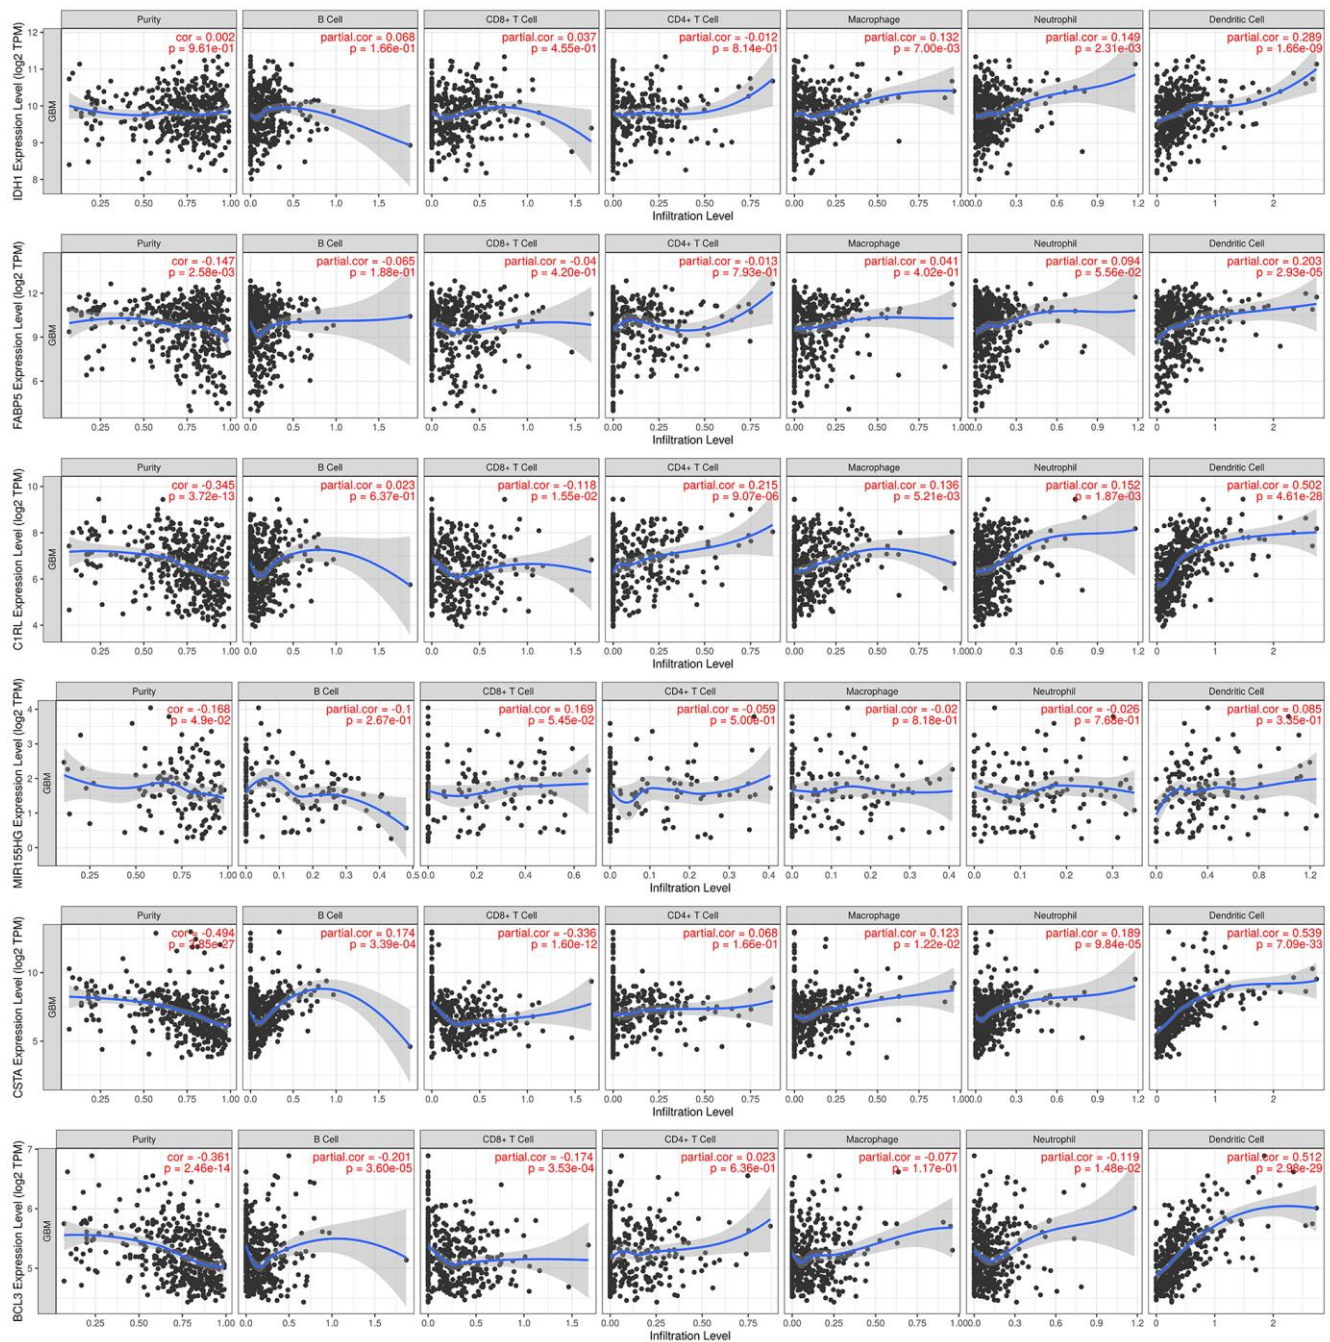

**Supplementary Figure 2. The immune correlation of key genes.** The correlation between expression levels of key genes and tumor purity or 6 classical immune cell infiltrations was calculated. Each dot represents a tumor sample. The blue line represents the correlation curve.
